# Supplementary material for: Concentration and source changes of HONO during the COVID-19 lockdown in Beijing
Source: Copernicus journal article supplement (doi:10.5194/egusphere-2023-3139), 2024-01-09
Supplement: Supplementary file 1 [file egusphere-2023-3139-supplement.pdf]

*Supplement of*

**Concentration and source changes of HONO during the  
COVID-19 lockdown in Beijing**

Yusheng Zhang<sup>1</sup>, Feixue Zheng<sup>1</sup>, Zemin Feng<sup>1,2</sup>, Chaofan Lian<sup>3,4</sup>, Weigang Wang<sup>3,4\*</sup>,  
Xiaolong Fan<sup>1,5,6</sup>, Wei Ma<sup>1</sup>, Zhuohui Lin<sup>1</sup>, Chang Li<sup>1</sup>, Gen Zhang<sup>7</sup>, Chao Yan<sup>8,9</sup>, Ying  
Zhang<sup>1,9</sup>, Veli-Matti Kerminen<sup>1,8</sup>, Federico Bianchi<sup>1,8</sup>, Tuukka Petäjä<sup>1,8</sup>, Juha  
Kangasluoma<sup>1,8</sup>, and Markku Kulmala<sup>1,8</sup>, Yongchun Liu<sup>1\*</sup>

*\*Correspondence:* Yongchun Liu (liuyc@buct.edu.cn) and Weigang Wang  
(wangwg@iccas.ac.cn)

**Table S1.** Instruments used in the measurement.

| Parameter             | Instrument                       | Time resolution | Detection limit                      | Accuracy |
|-----------------------|----------------------------------|-----------------|--------------------------------------|----------|
| HONO                  | LOPAP                            | 60 s            | 0.01 ppb                             | 10%      |
| NO                    | Thermo Scientific 42i            | 60 s            | 0.05 ppb                             | 5%       |
| NO <sub>2</sub>       | Thermo Scientific 42i            | 60 s            | 0.05 ppb                             | 5%       |
| SO <sub>2</sub>       | Thermo Scientific 43i            | 60 s            | 0.12 ppb                             | 5%       |
| CO                    | Thermo Scientific 48i            | 60 s            | 40 ppb                               | 5%       |
| O <sub>3</sub>        | Thermo Scientific 49i            | 60 s            | 0.5 ppb                              | 5%       |
| PM <sub>2.5</sub>     | TEOM                             | 300 s           | 0.05 µg m <sup>-3</sup>              | 10%      |
| Temperature           | AWS310                           | 60 s            | -                                    | 1%       |
| Relative humidity     | AWS310                           | 60 s            | -                                    | 1%       |
| Wind speed            | AWS310                           | 60 s            | 0.01 m s <sup>-1</sup>               | 1%       |
| Wind direction        | AWS310                           | 60 s            | -                                    | 1%       |
| UVB                   | AWS310                           | 60 s            | 0.001 W m <sup>-2</sup>              | 1%       |
| J <sub>NO2</sub>      | 2-pi-J <sub>NO2</sub> radiometer | 60 s            | 1.0×10 <sup>-5</sup> s <sup>-1</sup> | 1%       |
| Boundary layer height | Ceilometer (CL51)                | 60 s            | 50 m                                 | 10%      |
| Nitrate               | ToF-ACSM                         | 600 s           | 0.021 µg m <sup>-3</sup>             | 5%       |
| Sulfate               | ToF-ACSM                         | 600 s           | 0.018 µg m <sup>-3</sup>             | 5%       |
| Chloride              | ToF-ACSM                         | 600 s           | 0.011 µg m <sup>-3</sup>             | 5%       |
| Ammonium              | ToF-ACSM                         | 600 s           | 0.182 µg m <sup>-3</sup>             | 5%       |
| Organic               | ToF-ACSM                         | 600 s           | 0.198 µg m <sup>-3</sup>             | 5%       |

**Table S2.** Sensitivity analysis with different parameters for the HONO budget

| Method | Emission factor | OH                | $\gamma_{NO_2}$ (ground) | $\gamma_{NO_2}$ (aerosol) | $J_{NO_3^-}$          | $A_s$             | $\delta$ | $F_{HONO,soil}$   | $V_d$ | $K_{dilution}$ | Sensitivity |
|--------|-----------------|-------------------|--------------------------|---------------------------|-----------------------|-------------------|----------|-------------------|-------|----------------|-------------|
| M0     | 0.0109          | CaV1 <sup>a</sup> | $2 \times 10^{-6}$       | $2 \times 10^{-6}$        | $8.24 \times 10^{-5}$ | CaV2 <sup>b</sup> | 3.85     | CaV3 <sup>c</sup> | 0.001 | 0.23           | -           |
| M1     | 0.008           | CaV1              | $2 \times 10^{-6}$       | $2 \times 10^{-6}$        | $8.24 \times 10^{-5}$ | CaV2              | 3.85     | CaV3              | 0.001 | 0.23           | -8%         |
| M2     | 0.0186          | CaV1              | $2 \times 10^{-6}$       | $2 \times 10^{-6}$        | $8.24 \times 10^{-5}$ | CaV2              | 3.85     | CaV3              | 0.001 | 0.23           | 20%         |
| M3     | 0.0109          | CaV1 $\times 0.1$ | $2 \times 10^{-6}$       | $2 \times 10^{-6}$        | $8.24 \times 10^{-5}$ | CaV2              | 3.85     | CaV3              | 0.001 | 0.23           | -24%        |
| M4     | 0.0109          | CaV1 $\times 2$   | $2 \times 10^{-6}$       | $2 \times 10^{-6}$        | $8.24 \times 10^{-5}$ | CaV2              | 3.85     | CaV3              | 0.001 | 0.23           | 26%         |
| M5     | 0.0109          | CaV1              | $1 \times 10^{-5}$       | $2 \times 10^{-6}$        | $8.24 \times 10^{-5}$ | CaV2              | 3.85     | CaV3              | 0.001 | 0.23           | 40%         |
| M6     | 0.0109          | CaV1              | $2 \times 10^{-7}$       | $2 \times 10^{-6}$        | $8.24 \times 10^{-5}$ | CaV2              | 3.85     | CaV3              | 0.001 | 0.23           | -9%         |
| M7     | 0.0109          | CaV1              | $2 \times 10^{-6}$       | $1 \times 10^{-5}$        | $8.24 \times 10^{-5}$ | CaV2              | 3.85     | CaV3              | 0.001 | 0.23           | 4%          |
| M8     | 0.0109          | CaV1              | $2 \times 10^{-6}$       | $2 \times 10^{-7}$        | $8.24 \times 10^{-5}$ | CaV2              | 3.85     | CaV3              | 0.001 | 0.23           | -1%         |
| M9     | 0.0109          | CaV1              | $2 \times 10^{-6}$       | $2 \times 10^{-6}$        | $6.0 \times 10^{-6}$  | CaV2              | 3.85     | CaV3              | 0.001 | 0.23           | -25%        |
| M10    | 0.0109          | CaV1              | $2 \times 10^{-6}$       | $2 \times 10^{-6}$        | $3.7 \times 10^{-4}$  | CaV2              | 3.85     | CaV3              | 0.001 | 0.23           | 95%         |
| M11    | 0.0109          | CaV1              | $2 \times 10^{-6}$       | $2 \times 10^{-6}$        | $8.24 \times 10^{-5}$ | CaV2 $\times 0.1$ | 3.85     | CaV3              | 0.001 | 0.23           | -1%         |

|     |        |      |                    |                    |                       |                  |      |                   |         |      |      |
|-----|--------|------|--------------------|--------------------|-----------------------|------------------|------|-------------------|---------|------|------|
| M12 | 0.0109 | CaV1 | $2 \times 10^{-6}$ | $2 \times 10^{-6}$ | $8.24 \times 10^{-5}$ | CaV2 $\times 10$ | 3.85 | CaV3              | 0.001   | 0.23 | 9%   |
| M13 | 0.0109 | CaV1 | $2 \times 10^{-6}$ | $2 \times 10^{-6}$ | $8.24 \times 10^{-5}$ | CaV2             | 1    | CaV3              | 0.001   | 0.23 | -7%  |
| M14 | 0.0109 | CaV1 | $2 \times 10^{-6}$ | $2 \times 10^{-6}$ | $8.24 \times 10^{-5}$ | CaV2             | 2.2  | CaV3              | 0.001   | 0.23 | -4%  |
| M15 | 0.0109 | CaV1 | $2 \times 10^{-6}$ | $2 \times 10^{-6}$ | $8.24 \times 10^{-5}$ | CaV2             | 3.85 | CaV3 $\times 0.1$ | 0.001   | 0.23 | -1%  |
| M16 | 0.0109 | CaV1 | $2 \times 10^{-6}$ | $2 \times 10^{-6}$ | $8.24 \times 10^{-5}$ | CaV2             | 3.85 | CaV3 $\times 10$  | 0.001   | 0.23 | 4%   |
| M17 | 0.0109 | CaV1 | $2 \times 10^{-6}$ | $2 \times 10^{-6}$ | $8.24 \times 10^{-5}$ | CaV2             | 3.85 | CaV3              | 0.00077 | 0.23 | 1%   |
| M18 | 0.0109 | CaV1 | $2 \times 10^{-6}$ | $2 \times 10^{-6}$ | $8.24 \times 10^{-5}$ | CaV2             | 3.85 | CaV3              | 0.025   | 0.23 | -24% |
| M19 | 0.0109 | CaV1 | $2 \times 10^{-6}$ | $2 \times 10^{-6}$ | $8.24 \times 10^{-5}$ | CaV2             | 3.85 | CaV3              | 0.001   | 0.1  | 12%  |
| M20 | 0.0109 | CaV1 | $2 \times 10^{-6}$ | $2 \times 10^{-6}$ | $8.24 \times 10^{-5}$ | CaV2             | 3.85 | CaV3              | 0.001   | 0.44 | -19% |

Here CaV1<sup>a</sup>, CaV2<sup>b</sup> and CaV3<sup>c</sup> represented the Calculated values of OH (according to Eq. (8)),  $A_s$  is the surface area concentration of aerosol and  $F_{HONO,soil}$  is soil emission flux (Oswald et al., 2013). The emission factor and  $\delta$  are based on measurements in our previous work (Liu et al., 2020b).  $J_{NO_3^-}$  (Liu et al., 2020a),  $V_d$  (Han et al., 2017) and  $K_{dilution}$  (Dillon et al., 2002) are from references, respectively. The  $\gamma_{NO_2}$  for aerosol and ground surface are calculated using Eq. (3-7). M0 represents the parameterized scheme input for the base case. M1-M20 are sensitivity analyses for different parameters in the HONO budget analysis, respectively.

**Table S3.** Periods and mean values (mean  $\pm$  standard deviation, (minimum to maximum value)) of wind speed, PM<sub>2.5</sub>, RH, T, HONO, trace gas, and NR-PM<sub>2.5</sub> in field observation.

| Category                                                   | BCNY                                 | COVID                                |
|------------------------------------------------------------|--------------------------------------|--------------------------------------|
| Periods                                                    | January 1 - January 24               | January 25 - March 6                 |
| Wind speed (m/s)                                           | 0.64 $\pm$ 0.42 (0.04-3.65)          | 0.80 $\pm$ 0.55 (0.02-3.86)          |
| PM <sub>2.5</sub> ( $\mu\text{g}/\text{m}^3$ )             | 47.23 $\pm$ 44.50 (3-265)            | 69.86 $\pm$ 67.26 (2-268)            |
| RH (%)                                                     | 36.79 $\pm$ 14.66 (12-94)            | 45.14 $\pm$ 21.20 (12-95)            |
| T ( $^{\circ}\text{C}$ )                                   | 0.89 $\pm$ 2.98 (-7.5-9.9)           | 3.42 $\pm$ 3.97 (-6.8-12.6)          |
| HONO (ppb)                                                 | 0.97 $\pm$ 0.74 (0.17-3.85)          | 0.53 $\pm$ 0.45 (0.01-2.11)          |
| NO (ppb)                                                   | 18.42 $\pm$ 29.24 (0.03-162.92)      | 2.44 $\pm$ 5.40 (0.01-51.08)         |
| NO <sub>2</sub> (ppb)                                      | 26.99 $\pm$ 13.41 (2.68-54.51)       | 17.26 $\pm$ 11.34 (0.57-64.44)       |
| NO <sub>x</sub> (ppb)                                      | 45.35 $\pm$ 38.90 (2.27-207.46)      | 19.52 $\pm$ 14.41 (0.33-89.09)       |
| CO (ppb)                                                   | 907.72 $\pm$ 499.16 (294.93-3013.30) | 954.87 $\pm$ 624.04 (242.24-3751.68) |
| SO <sub>2</sub> (ppb)                                      | 2.09 $\pm$ 1.36 (0.03-8.56)          | 1.47 $\pm$ 1.95 (0.01-14.25)         |
| O <sub>3</sub> (ppb)                                       | 12.16 $\pm$ 10.79 (0.38-37.90)       | 21.29 $\pm$ 11.78 (0.56-60.69)       |
| NO <sub>3</sub> <sup>-</sup> ( $\mu\text{g}/\text{m}^3$ )  | 9.99 $\pm$ 9.72 (0.09-57.62)         | 16.71 $\pm$ 18.20 (0.08-89.28)       |
| SO <sub>4</sub> <sup>2-</sup> ( $\mu\text{g}/\text{m}^3$ ) | 4.59 $\pm$ 7.08 (0.43-56.91)         | 7.99 $\pm$ 8.61 (0.35-37.39)         |
| NH <sub>4</sub> <sup>+</sup> ( $\mu\text{g}/\text{m}^3$ )  | 4.95 $\pm$ 5.08 (0.23-31.90)         | 9.24 $\pm$ 10.32 (0.17-51.36)        |
| Cl <sup>-</sup> ( $\mu\text{g}/\text{m}^3$ )               | 1.22 $\pm$ 1.24 (0.01-6.72)          | 1.42 $\pm$ 1.53 (0.01-8.37)          |
| OA ( $\mu\text{g}/\text{m}^3$ )                            | 14.71 $\pm$ 10.75 (0.88-60.54)       | 18.19 $\pm$ 16.52 (0.88-77.28)       |

**Table S4.** Summaries for HONO concentration of field observation.

| Location                                  | Date                           | HONO                       | NO <sub>2</sub>         | NO         | PM <sub>2.5</sub> |
|-------------------------------------------|--------------------------------|----------------------------|-------------------------|------------|-------------------|
| This study                                | 2020.1.1-2020.1.24             | 0.97±0.74                  | 26.9±13.41              | 18.4±29.24 | 47.2±44.5         |
|                                           | 2020.1.25-2020.3.6             | 0.53±0.44                  | 17.2±11.34              | 2.43±5.39  | 69.9±67.2         |
| Shijia Zhuang<br>(Liu et al., 2020a)      | 2019.12.15-2020.1.22           | 2.43±1.08                  | 31.7                    | 26.3±26.2  | 137.9±85.8        |
| Beijing<br>(Liu et al., 2020b)            | 2018.2.1-2018.6.30             | 1.26±1.06                  |                         |            |                   |
| Guangzhou<br>(Li et al., 2012)            | 2006.7.3-2006.7.31             | 0.95(night)<br>0.24(day)   | 16.5(night)<br>4.5(day) |            |                   |
| Beijing<br>(Spataro et al., 2013)         | 2007.1.23-2007.2.14            | 1.04±0.73                  | 38.76±10.02             |            |                   |
|                                           | 2007.8.2-2007.8.31             | 1.45±0.58                  | 31.7±7.82               |            | 70.12±29.62       |
| Hyytiälä.Finland<br>(Oswald et al., 2015) | 2010.7.12-2010.8.12            | 0.037(night)<br>0.027(day) |                         |            |                   |
|                                           | Beijing<br>(Tong et al., 2015) | 2014.10.28-2014.12.2       | 1.45                    | 37.4       | 44.4              |
| Hong Kong<br>(Xu et al., 2015)            | 2011.8(Summer)                 | 0.65                       | 19.8                    | 8          |                   |
|                                           | 2011.11(Autumn)                | 0.93                       | 26.8                    | 10.1       |                   |
|                                           | 2012.2(Winter)                 | 0.91                       | 24.7                    | 19.3       |                   |

|                                |                         |                           |                          |                            |                          |
|--------------------------------|-------------------------|---------------------------|--------------------------|----------------------------|--------------------------|
|                                | 2012.5(Spring)          | 0.35                      | 15.5                     | 5.5                        |                          |
| Beijing<br>(Tong et al., 2016) | 2015.12.12-2015.12.22   | 1.34(haze)<br>0.51(clean) | 28.4(haze)<br>7.1(clean) | 70.73(haze)<br>17.0(clean) | 144 (haze)<br>29 (clean) |
| Xi'an<br>(Huang et al., 2017)  | 2015.7.24-2015.8.6      | 1.12±0.97                 | 20.9±11.0                |                            |                          |
| Beijing<br>(Wang et al., 2017) | 2015.9.22-10.21(Autumn) | 2.27±1.82                 | 32.91±20.44              | 38.79(night)               | 99.28(night)             |
|                                | 2016.1.3-1.27(Winter)   | 1.05±0.89                 | 19.96±16.28              | 65.65(night)               | 95.75(night)             |
|                                | 2016.4.1-5.14(Spring)   | 1.05±0.95                 | 25.97±15.8               | 21.39(night)               | 56.6(night)              |
|                                | 2016.6.20-7.25(Summer)  | 1.38±0.9                  | 19.21±11.25              | 3.08(night)                | 49.55(night)             |
| Shanghai<br>(Cui et al., 2018) | 2016.5.12-2016.5.28     | 2.31                      | 46.46                    |                            |                          |
| Ji'nan<br>(Li et al., 2018)    | 2015.9-2015.11(Autumn)  | 0.87±0.66                 | 25.4±23.2                | 12.6                       |                          |
|                                | 2015.12-2016.2(Winter)  | 2.15±1.35                 | 41.1±34.6                | 37.4                       |                          |
|                                | 2016.3-2016.5(Spring)   | 1.24±1.04                 | 35.8±25.8                | 11.5                       |                          |
|                                | 2016.6-2016.8(Summer)   | 1.2±1.01                  | 22.5±19.0                | 6.6                        |                          |
| Nanjing<br>(Liu et al., 2019)  | 2017.12-2018.2(Winter)  | 1.15(night); 0.92(day)    | 28.4(night);23(day)      | 17.1(night);14.6(day)      |                          |
|                                | 2018.3-5 (Spring)       | 0.76(night);0.59 (day)    | 17.4(night);12.9(day)    | 1.7(night);3.0(day)        |                          |
|                                | 2018.6-8 (Summer)       | 0.56(night);0.34(day)     | 12.5(night);7.7(day)     | 1.0(night);1.4(day)        |                          |

---

|                                 |                              |                       |                       |                      |
|---------------------------------|------------------------------|-----------------------|-----------------------|----------------------|
|                                 | 2018.9-11 (Autumn)           | 0.81(night);0.51(day) | 18.9(night);13.4(day) | 6.2(night);4.3(day)  |
| Beijing<br>(Zhang et al., 2019) | 2016.12                      | 3.5±2.7               | 56±23                 | 67±48                |
|                                 | 2016.12(clean)               | 0.5 ± 0.2             | 19 ± 9                | 5 ± 5                |
|                                 | 2016.12(haze)                | 3.4 ± 1.7             | 60 ± 13               | 75 ± 39              |
|                                 | 2016.12(severe haze)         | 5.8 ± 3.0             | 76 ± 14               | 94 ± 40              |
| Nanjing<br>(Zheng et al., 2020) | 2015.12.1-12.31              | 1.32±0.92             | 23.9±7.5              |                      |
| Beijing<br>(Liu et al., 2021)   | 2018.5.25-7.15(Summer)       | 1.27 ± 0.44           | 18.98 ± 4.47          |                      |
|                                 | 2018.11.26-2019.1.15(winter) | 1.13 ± 0.68           | 19.99 ± 9.38          |                      |
| Xiamen<br>(Hu et al., 2022)     | 2018.8 (Summer)              | 0.51(night);0.72(day) | 15.7(night);11.0(day) | 3.2(night);5.6(day)  |
|                                 | 2018.10 (Autumn)             | 0.33(night);0.50(day) | 14.3(night);11.4(day) | 0.8(night);2.7(day)  |
|                                 | 2018.12 (Winter)             | 0.52(night);0.61(day) | 18.3(night);15.8(day) | 4.8(night);12.2(day) |
|                                 | 2019.3 (Spring)              | 0.51(night);0.72(day) | 17.7(night);18.5(day) | 6.8(night);10.1(day) |
| Guangzhou<br>(Yu et al., 2022)  | 2018.9-11                    | 0.91(night);0.44(day) | 36.9(night);23.3(day) | 10.8(night);6.8(day) |

---



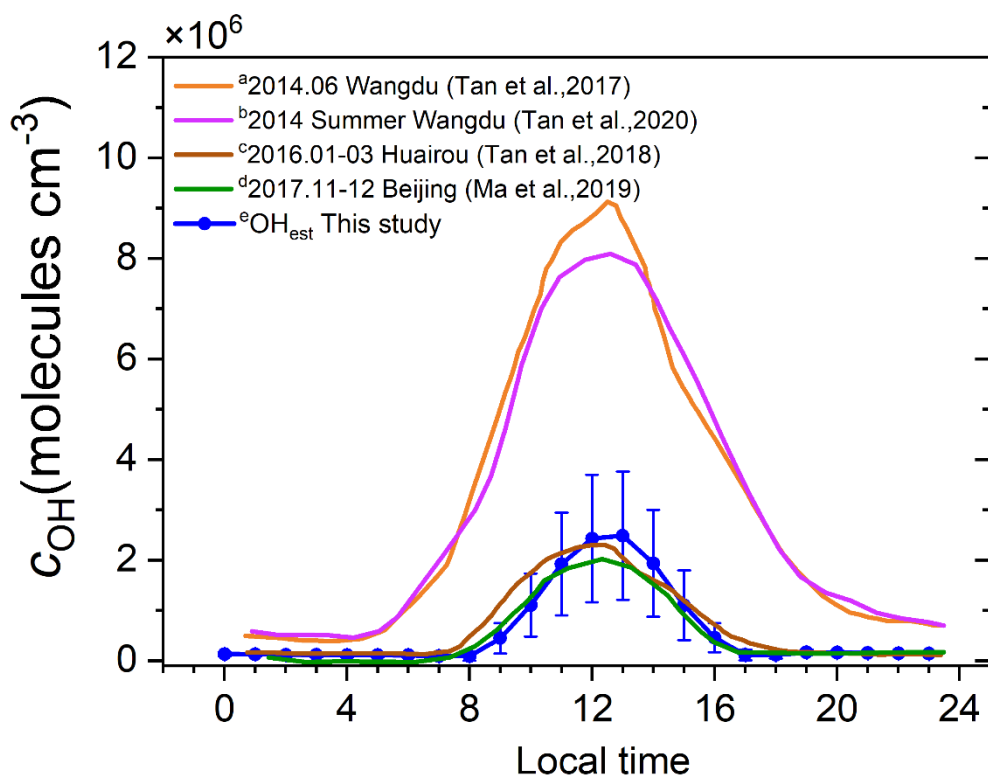

**Figure S1.** Diurnal variation of OH concentrations observed in different areas of the North China Plain (a-d) (Tan et al., 2017; Tan et al., 2018; Ma et al., 2019; Tan et al., 2020) and parameterized fitting in this study (e).

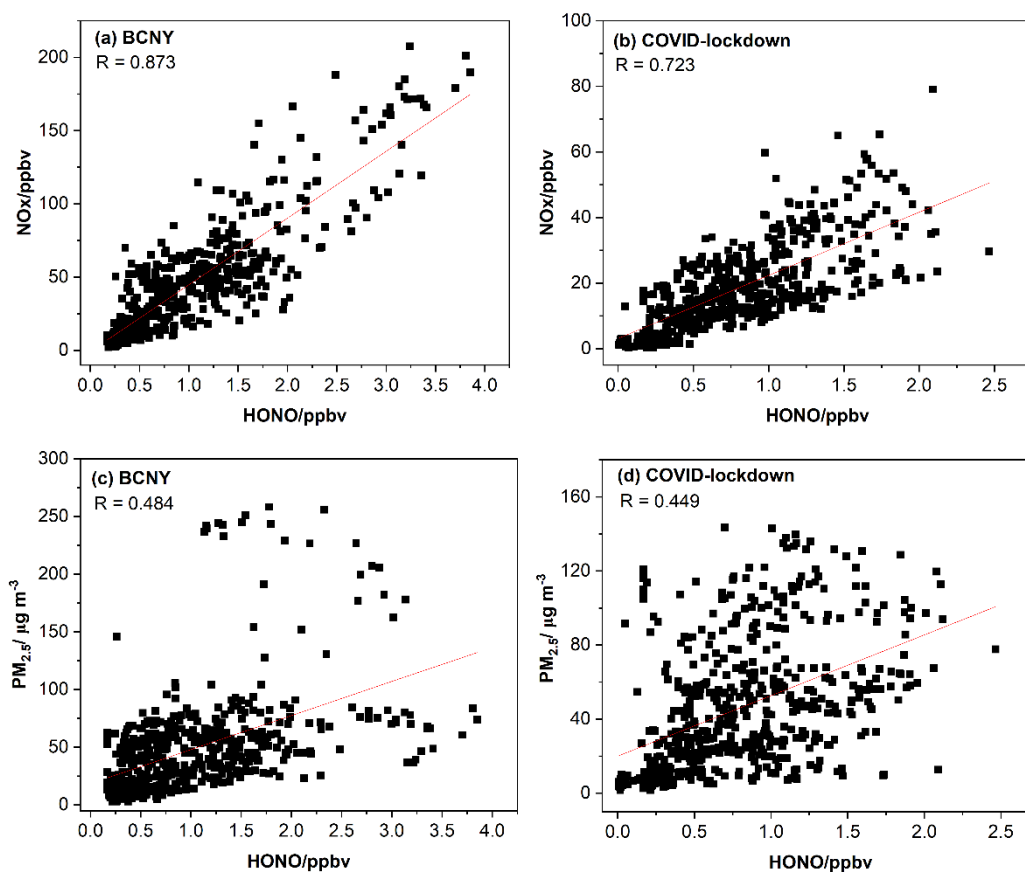

**Figure S2.** Correlation and scatterplot between HONO, NO<sub>x</sub> (a: BCNY; b: COVID-lockdown) and PM<sub>2.5</sub> (c: BCNY; d: COVID-lockdown).

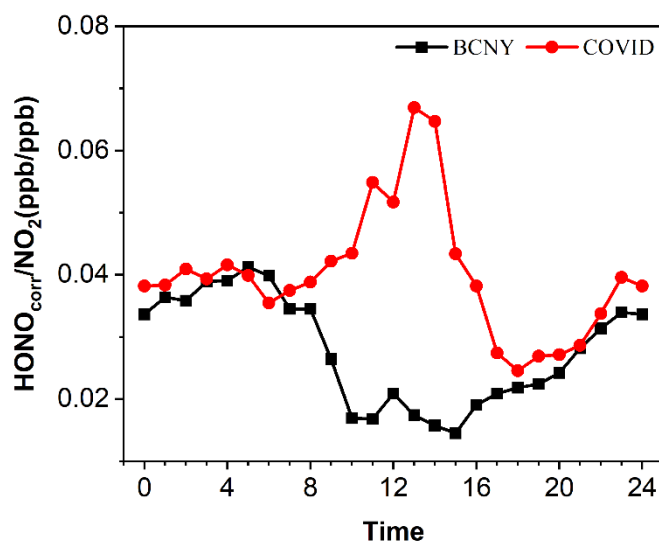

**Figure S3.** Diurnal variations of observed  $\text{HONO}_{\text{corr}}/\text{NO}_2$  in BCNY (black line) and COVID (red line).

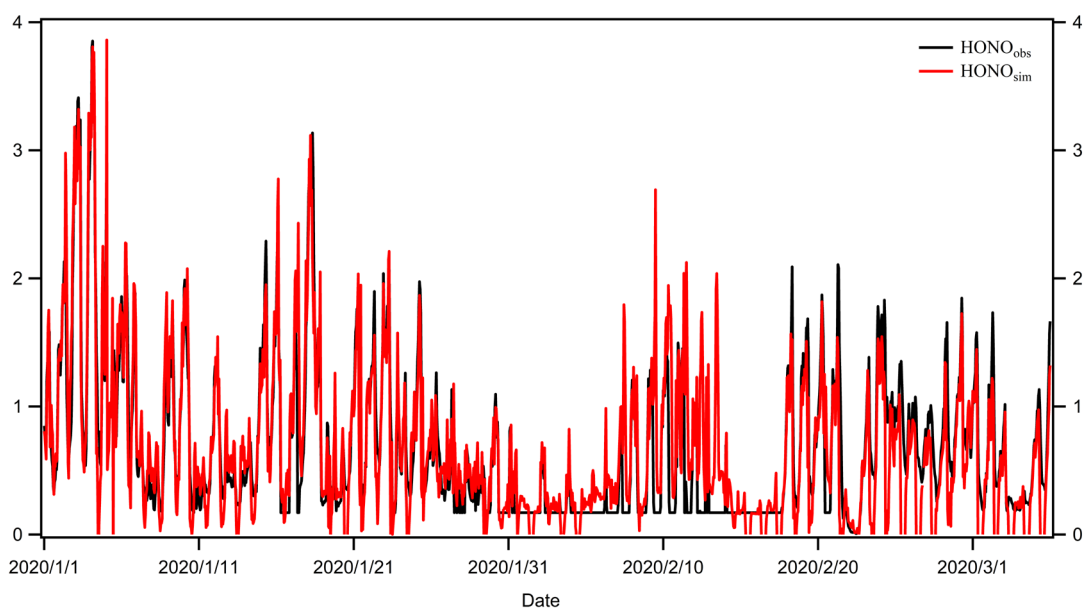

**Figure S4.** Comparison of simulated ( $\text{HONO}_{\text{sim}}$ , red line) and observed ( $\text{HONO}_{\text{obs}}$ , black line) hourly mean HONO concentration at the BUCT site over the period Jan. 1~Mar. 6, 2020.

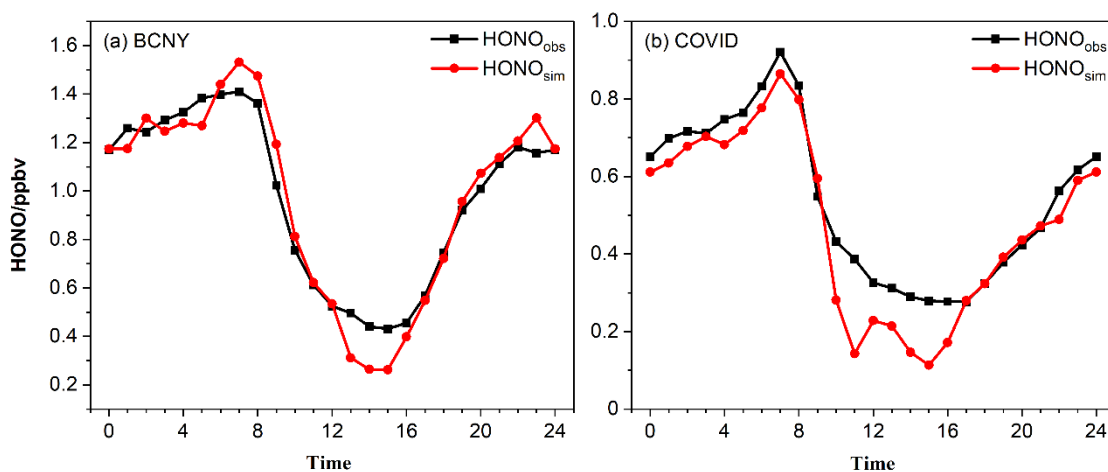

**Figure S5.** Observed and simulated HONO concentrations. Diurnal variations of observed HONO ( $\text{HONO}_{\text{obs}}$ , black line) and simulated HONO ( $\text{HONO}_{\text{sim}}$ , red line) in (a) BCNY and (b) COVID.

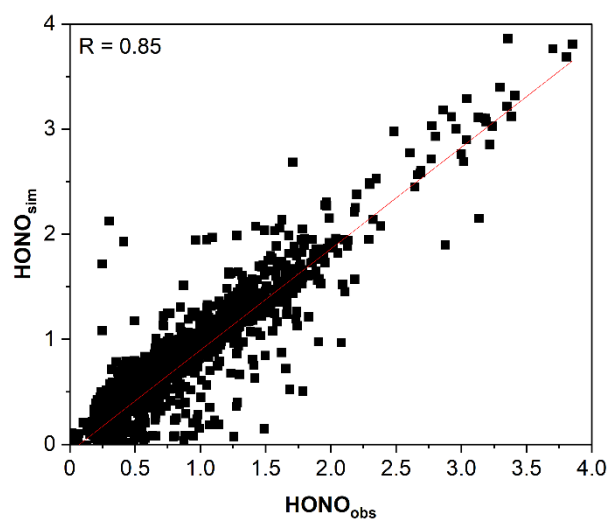

**Figure S6.** Correlation and Scatter plots between  $HONO_{obs}$  and  $HONO_{sim}$ .

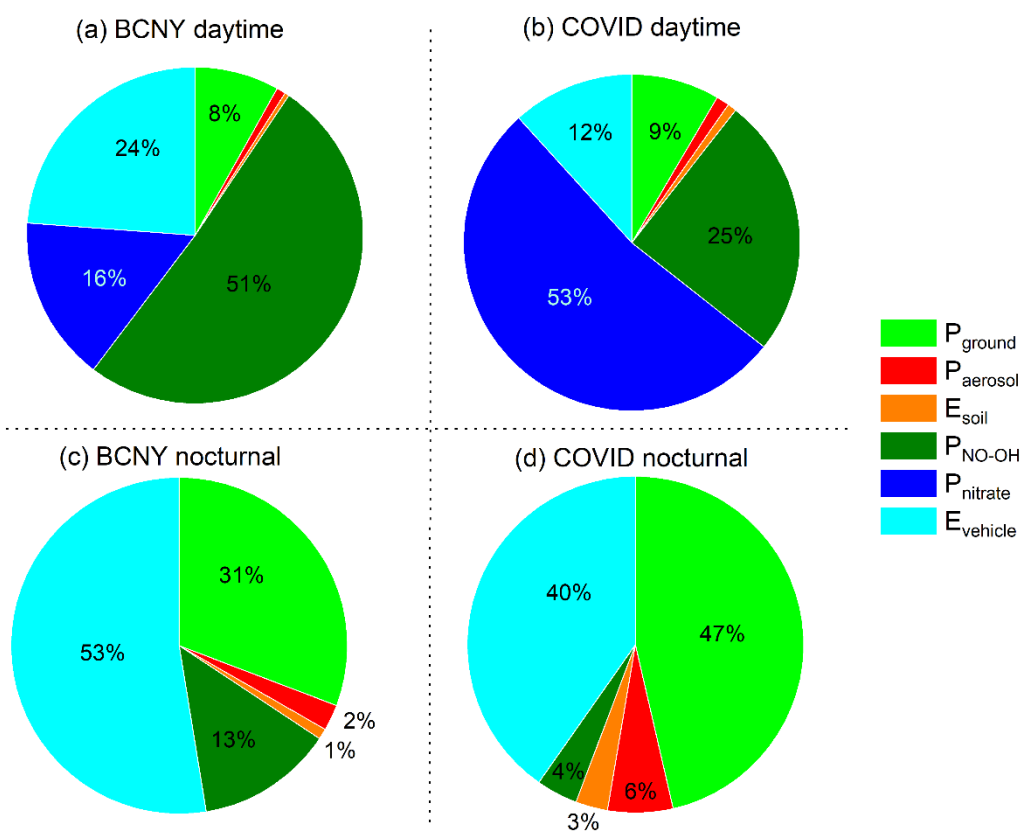

**Figure S7.** The percentage of daytime and nighttime contribution from different sources in (a,c) BCNY and (b,d) COVID.

## Reference

- Cui, L., Li, R., Zhang, Y., Meng, Y., Fu, H., and Chen, J.: An observational study of nitrous acid (HONO) in Shanghai, China: The aerosol impact on HONO formation during the haze episodes, *Sci Total Environ*, 630, 1057-1070, 10.1016/j.scitotenv.2018.02.063, 2018.
- Dillon, M. B., Lamanna, M. S., Schade, G. W., Goldstein, A. H., and Cohen, R. C.: Chemical evolution of the Sacramento urban plume: Transport and oxidation, *Journal of Geophysical Research: Atmospheres*, 107, ACH 3-1-ACH 3-15, 10.1029/2001jd000969, 2002.
- Han, X., Zhang, M., Skorokhod, A., and Kou, X.: Modeling dry deposition of reactive nitrogen in China with RAMS-CMAQ, *Atmospheric Environment*, 166, 47-61, 10.1016/j.atmosenv.2017.07.015, 2017.
- Hu, B., Duan, J., Hong, Y., Xu, L., Li, M., Bian, Y., Qin, M., Fang, W., Xie, P., and Chen, J.: Exploration of the atmospheric chemistry of nitrous acid in a coastal city of southeastern China: results from measurements across four seasons, *Atmospheric Chemistry and Physics*, 22, 371-393, 10.5194/acp-22-371-2022, 2022.
- Huang, R. J., Yang, L., Cao, J., Wang, Q., Tie, X., Ho, K. F., Shen, Z., Zhang, R., Li, G., Zhu, C., Zhang, N., Dai, W., Zhou, J., Liu, S., Chen, Y., Chen, J., and O'Dowd, C. D.: Concentration and sources of atmospheric nitrous acid (HONO) at an urban site in Western China, *Sci Total Environ*, 593-594, 165-172, 10.1016/j.scitotenv.2017.02.166, 2017.
- Li, D., Xue, L., Wen, L., Wang, X., Chen, T., Mellouki, A., Chen, J., and Wang, W.: Characteristics and sources of nitrous acid in an urban atmosphere of northern China: Results from 1-yr continuous observations, *Atmospheric Environment*, 182, 296-306, 10.1016/j.atmosenv.2018.03.033, 2018.
- Li, X., Brauers, T., Häseler, R., Bohn, B., Fuchs, H., Hofzumahaus, A., Holland, F., Lou, S., Lu, K. D., Rohrer, F., Hu, M., Zeng, L. M., Zhang, Y. H., Garland, R. M., Su, H., Nowak, A., Wiedensohler, A., Takegawa, N., Shao, M., and Wahner, A.: Exploring the atmospheric chemistry of nitrous acid (HONO) at a rural site in Southern China, *Atmospheric Chemistry and Physics*, 12, 1497-1513, 10.5194/acp-12-1497-2012, 2012.
- Liu, J., Liu, Z., Ma, Z., Yang, S., Yao, D., Zhao, S., Hu, B., Tang, G., Sun, J., Cheng, M., Xu, Z., and Wang, Y.: Detailed budget analysis of HONO in Beijing, China: Implication on atmosphere oxidation capacity in polluted megacity, *Atmospheric Environment*, 244, 10.1016/j.atmosenv.2020.117957, 2021.
- Liu, Y., Nie, W., Xu, Z., Wang, T., Wang, R., Li, Y., Wang, L., Chi, X., and Ding, A.: Semi-quantitative understanding of source contribution to nitrous acid (HONO) based on 1 year of continuous observation at the SORPES station in eastern China, *Atmospheric Chemistry and Physics*, 19, 13289-13308, 10.5194/acp-19-13289-2019, 2019.
- Liu, Y., Ni, S., Jiang, T., Xing, S., Zhang, Y., Bao, X., Feng, Z., Fan, X., Zhang, L., and Feng, H.: Influence of Chinese New Year overlapping COVID-19 lockdown on HONO sources in Shijiazhuang, *Sci Total Environ*, 745, 141025, 10.1016/j.scitotenv.2020.141025, 2020a.
- Liu, Y., Zhang, Y., Lian, C., Yan, C., Feng, Z., Zheng, F., Fan, X., Chen, Y., Wang, W., Chu, B., Wang, Y., Cai, J., Du, W., Daellenbach, K. R., Kangasluoma, J., Bianchi, F., Kujansuu, J., Petäjä, T., Wang, X., Hu, B., Wang, Y., Ge, M., He, H., and Kulmala, M.: The promotion effect of nitrous acid on aerosol formation in wintertime in Beijing: the possible contribution of traffic-related emissions, *Atmospheric Chemistry and Physics*, 20, 13023-13040, 10.5194/acp-20-13023-2020, 2020b.
- Ma, X., Tan, Z., Lu, K., Yang, X., Liu, Y., Li, S., Li, X., Chen, S., Novelli, A., Cho, C., Zeng, L., Wahner, A., and Zhang, Y.: Winter photochemistry in Beijing: Observation and model simulation of OH and HO<sub>2</sub> radicals at an urban site, *Sci Total Environ*, 685, 85-95, 10.1016/j.scitotenv.2019.05.329, 2019.

Oswald, R., Behrendt, T., Ermel, M., Wu, D., Su, H., Cheng, Y., Breuninger, C., Moravek, A., Mougín, E., Delon, C., Loubet, B., Pommerening-Roser, A., Sorgel, M., Poschl, U., Hoffmann, T., Andreae, M. O., Meixner, F. X., and Trebs, I.: HONO emissions from soil bacteria as a major source of atmospheric reactive nitrogen, *Science*, 341, 1233-1235, 10.1126/science.1242266, 2013.

Oswald, R., Ermel, M., Hens, K., Novelli, A., Ouwersloot, H. G., Paasonen, P., Petäjä, T., Sipilä, M., Keronen, P., Bäck, J., Königstedt, R., Hosaynali Beygi, Z., Fischer, H., Bohn, B., Kubistin, D., Harder, H., Martinez, M., Williams, J., Hoffmann, T., Trebs, I., and Sörgel, M.: A comparison of HONO budgets for two measurement heights at a field station within the boreal forest in Finland, *Atmospheric Chemistry and Physics*, 15, 799-813, 10.5194/acp-15-799-2015, 2015.

Spataro, F., Ianniello, A., Esposito, G., Allegrini, I., Zhu, T., and Hu, M.: Occurrence of atmospheric nitrous acid in the urban area of Beijing (China), *Science of The Total Environment*, 447, 210-224, 10.1016/j.scitotenv.2012.12.065, 2013.

Tan, Z., Hofzumahaus, A., Lu, K., Brown, S. S., Holland, F., Huey, L. G., Kiendler-Scharr, A., Li, X., Liu, X., Ma, N., Min, K. E., Rohrer, F., Shao, M., Wahner, A., Wang, Y., Wiedensohler, A., Wu, Y., Wu, Z., Zeng, L., Zhang, Y., and Fuchs, H.: No Evidence for a Significant Impact of Heterogeneous Chemistry on Radical Concentrations in the North China Plain in Summer 2014, *Environ Sci Technol*, 54, 5973-5979, 10.1021/acs.est.0c00525, 2020.

Tan, Z., Fuchs, H., Lu, K., Hofzumahaus, A., Bohn, B., Broch, S., Dong, H., Gomm, S., Häsel, R., He, L., Holland, F., Li, X., Liu, Y., Lu, S., Rohrer, F., Shao, M., Wang, B., Wang, M., Wu, Y., Zeng, L., Zhang, Y., Wahner, A., and Zhang, Y.: Radical chemistry at a rural site (Wangdu) in the North China Plain: observation and model calculations of OH, HO<sub>2</sub> and RO<sub>2</sub> radicals, *Atmospheric Chemistry and Physics*, 17, 663-690, 10.5194/acp-17-663-2017, 2017.

Tan, Z., Rohrer, F., Lu, K., Ma, X., Bohn, B., Broch, S., Dong, H., Fuchs, H., Gkatzelis, G. I., Hofzumahaus, A., Holland, F., Li, X., Liu, Y., Liu, Y., Novelli, A., Shao, M., Wang, H., Wu, Y., Zeng, L., Hu, M., Kiendler-Scharr, A., Wahner, A., and Zhang, Y.: Wintertime photochemistry in Beijing: observations of RO<sub>x</sub> radical concentrations in the North China Plain during the BEST-ONE campaign, *Atmospheric Chemistry and Physics*, 18, 12391-12411, 10.5194/acp-18-12391-2018, 2018.

Tong, S., Hou, S., Zhang, Y., Chu, B., Liu, Y., He, H., Zhao, P., and Ge, M.: Comparisons of measured nitrous acid (HONO) concentrations in a pollution period at urban and suburban Beijing, in autumn of 2014, *Science China Chemistry*, 58, 1393-1402, 10.1007/s11426-015-5454-2, 2015.

Tong, S., Hou, S., Zhang, Y., Chu, B., Liu, Y., He, H., Zhao, P., and Ge, M.: Exploring the nitrous acid (HONO) formation mechanism in winter Beijing: direct emissions and heterogeneous production in urban and suburban areas, *Faraday Discuss*, 189, 213-230, 10.1039/c5fd00163c, 2016.

Wang, J., Zhang, X., Guo, J., Wang, Z., and Zhang, M.: Observation of nitrous acid (HONO) in Beijing, China: Seasonal variation, nocturnal formation and daytime budget, *Sci Total Environ*, 587-588, 350-359, 10.1016/j.scitotenv.2017.02.159, 2017.

Xu, Z., Wang, T., Wu, J., Xue, L., Chan, J., Zha, Q., Zhou, S., Louie, P. K. K., and Luk, C. W. Y.: Nitrous acid (HONO) in a polluted subtropical atmosphere: Seasonal variability, direct vehicle emissions and heterogeneous production at ground surface, *Atmospheric Environment*, 106, 100-109, 10.1016/j.atmosenv.2015.01.061, 2015.

Yu, Y., Cheng, P., Li, H., Yang, W., Han, B., Song, W., Hu, W., Wang, X., Yuan, B., Shao, M., Huang, Z., Li, Z., Zheng, J., Wang, H., and Yu, X.: Budget of nitrous acid (HONO) at an urban site in the fall season of Guangzhou, China, *Atmospheric Chemistry and Physics*, 22, 8951-8971, 10.5194/acp-22-8951-2022, 2022.

Zhang, W., Tong, S., Ge, M., An, J., Shi, Z., Hou, S., Xia, K., Qu, Y., Zhang, H., Chu, B., Sun, Y., and He, H.: Variations and sources of nitrous acid (HONO) during a severe pollution episode in Beijing in winter 2016, *Sci Total Environ*, 648, 253-262, 10.1016/j.scitotenv.2018.08.133, 2019.

Zheng, J., Shi, X., Ma, Y., Ren, X., Jabbour, H., Diao, Y., Wang, W., Ge, Y., Zhang, Y., and Zhu, W.: Contribution of nitrous acid to the atmospheric oxidation capacity in an industrial zone in the Yangtze River Delta region of China, *Atmospheric Chemistry and Physics*, 20, 5457-5475, 10.5194/acp-20-5457-2020, 2020.
